# Supplementary material
Source: publisher site journal article supplement (https://www.dovepress.com/article/601940)
Supplement: Supplementary file 1 [file 601940%20Supplementary%20Materials.docx]

**Supporting Information**


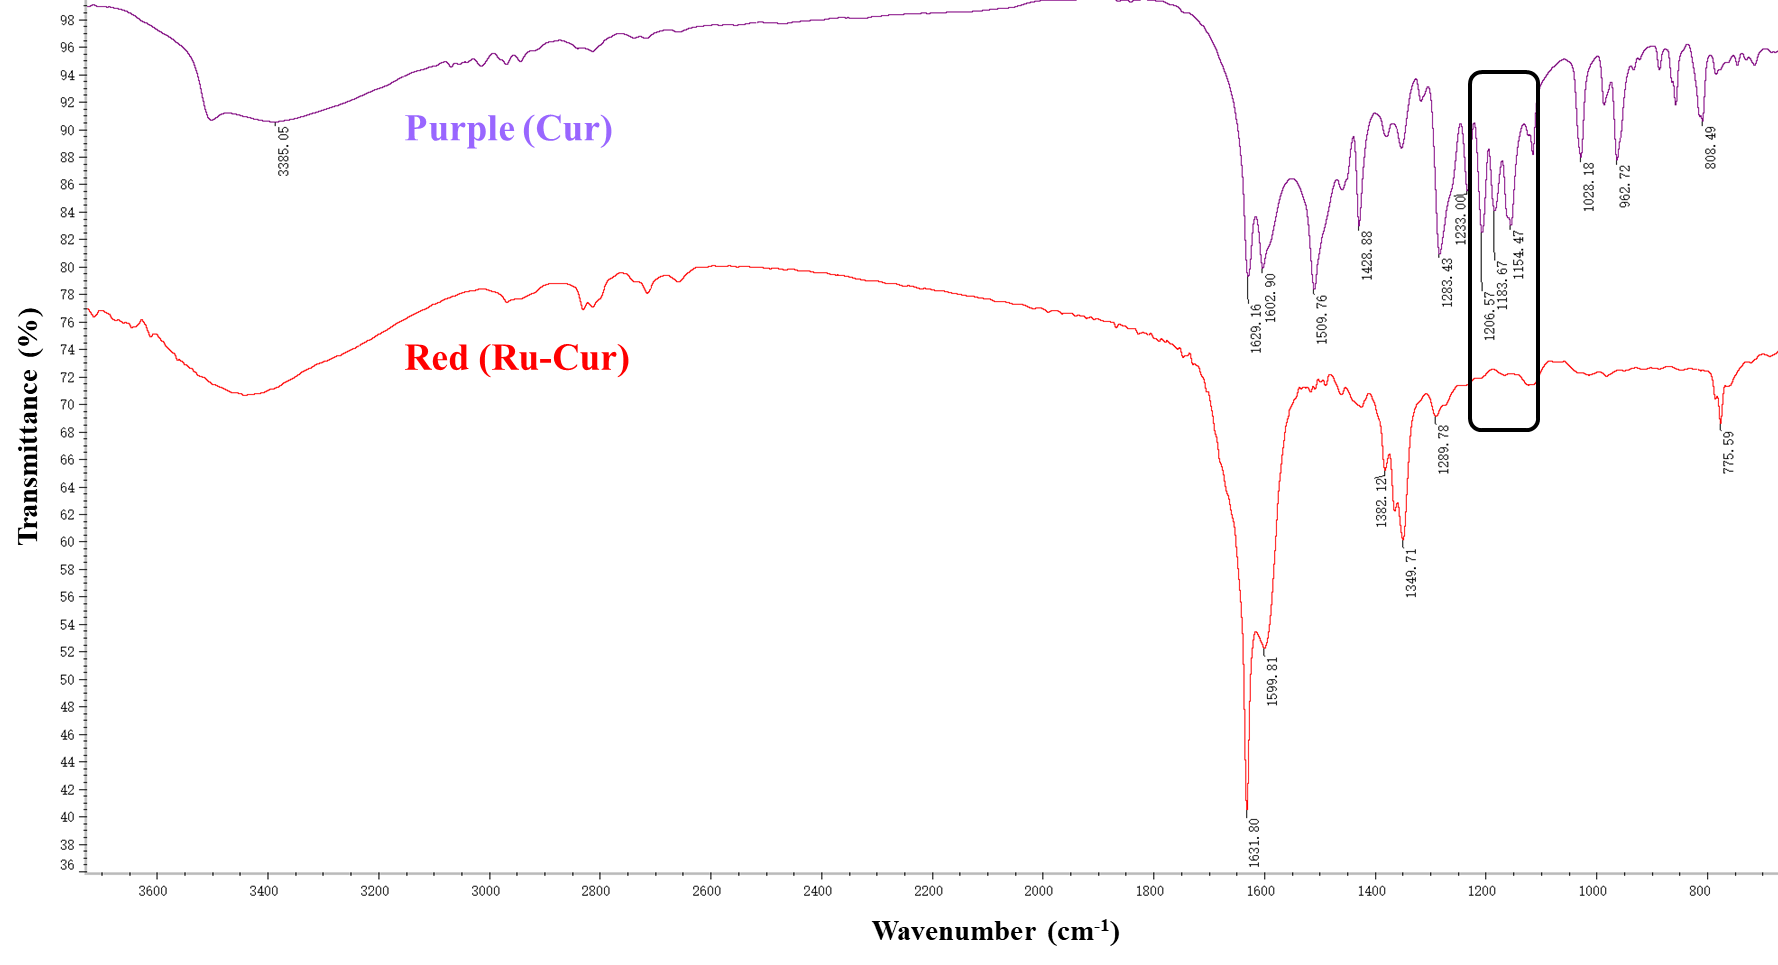


Figure S1.Fourier transform infrared spectroscopy of Cur and Ru-Cur. The black box highlights the wavenumber region of 1150-1200 cm-1.


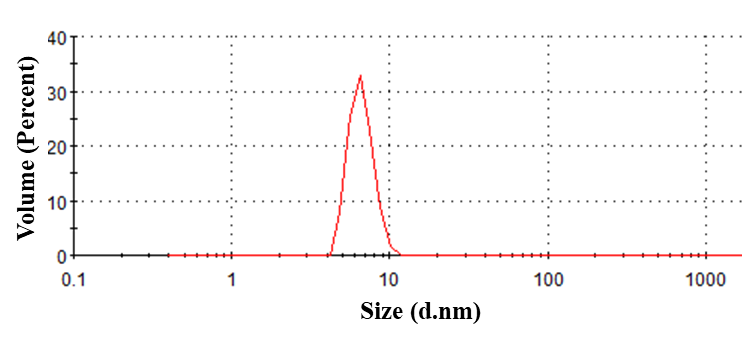


Figure S2.Particle size distribution of LMWC/Ru-Cur.


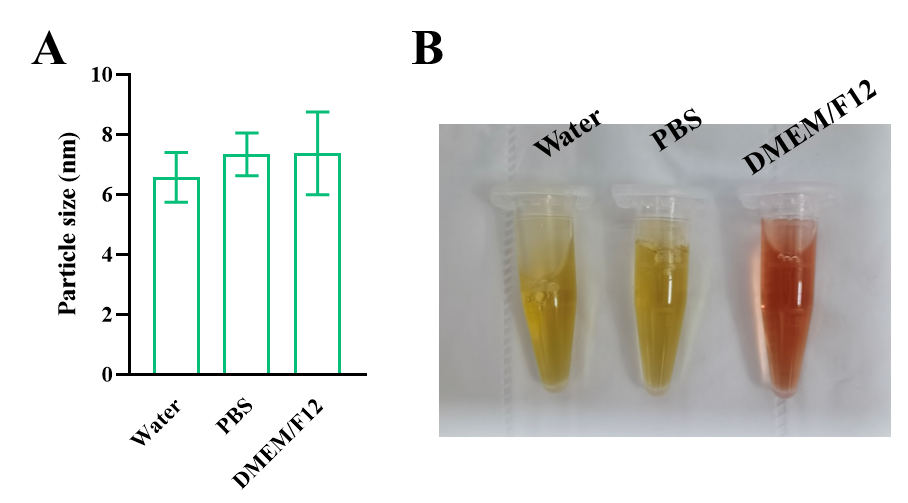


Figure S3. The size changes of LMWC/Ru-Cur in DD water, PBS, and DMEM/F12 culture medium after 2-day incubation (A), and their sample photographs (B). Data are presented as means ± SD with n = 3 replicates per group.


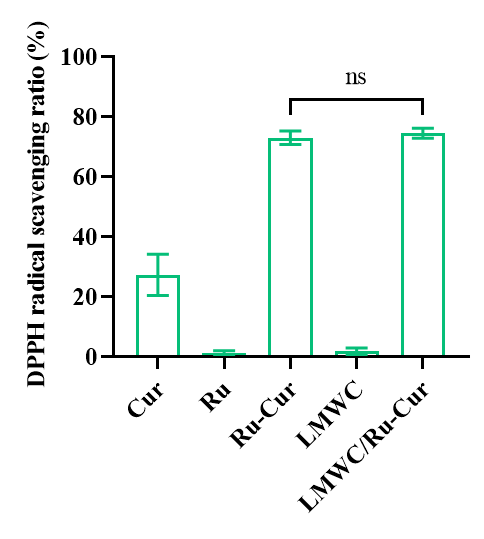


Figure S4.DPPH free radicals scavenging activity of Cur, Ru, Ru-Cur, LMWC, and LMWC/Ru-Cur. Data are presented as means ± SD with n = 3 replicates per group. ns = not significant.


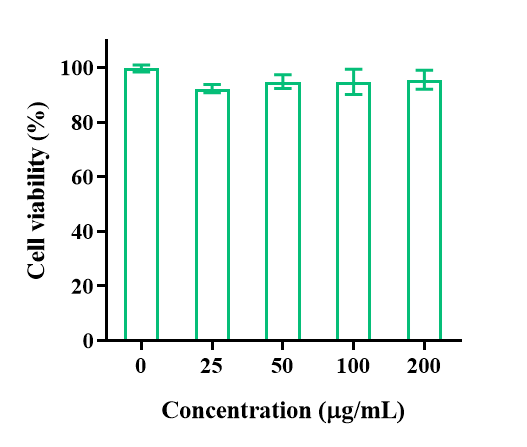


Figure S5. The cell viability of HK-2 cells after incubated with different concentrations of LMWC/Ru-Cur for 24 h. Data are presented as means ± SD with n = 3 replicates per group.


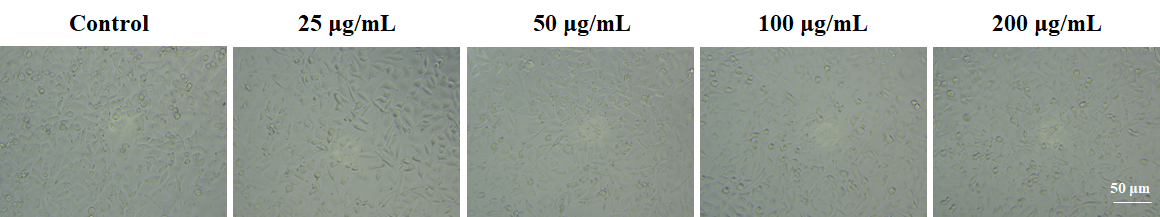


Figure S6. The cellular morphology of HK-2 cells. Scale bar 50 µm.


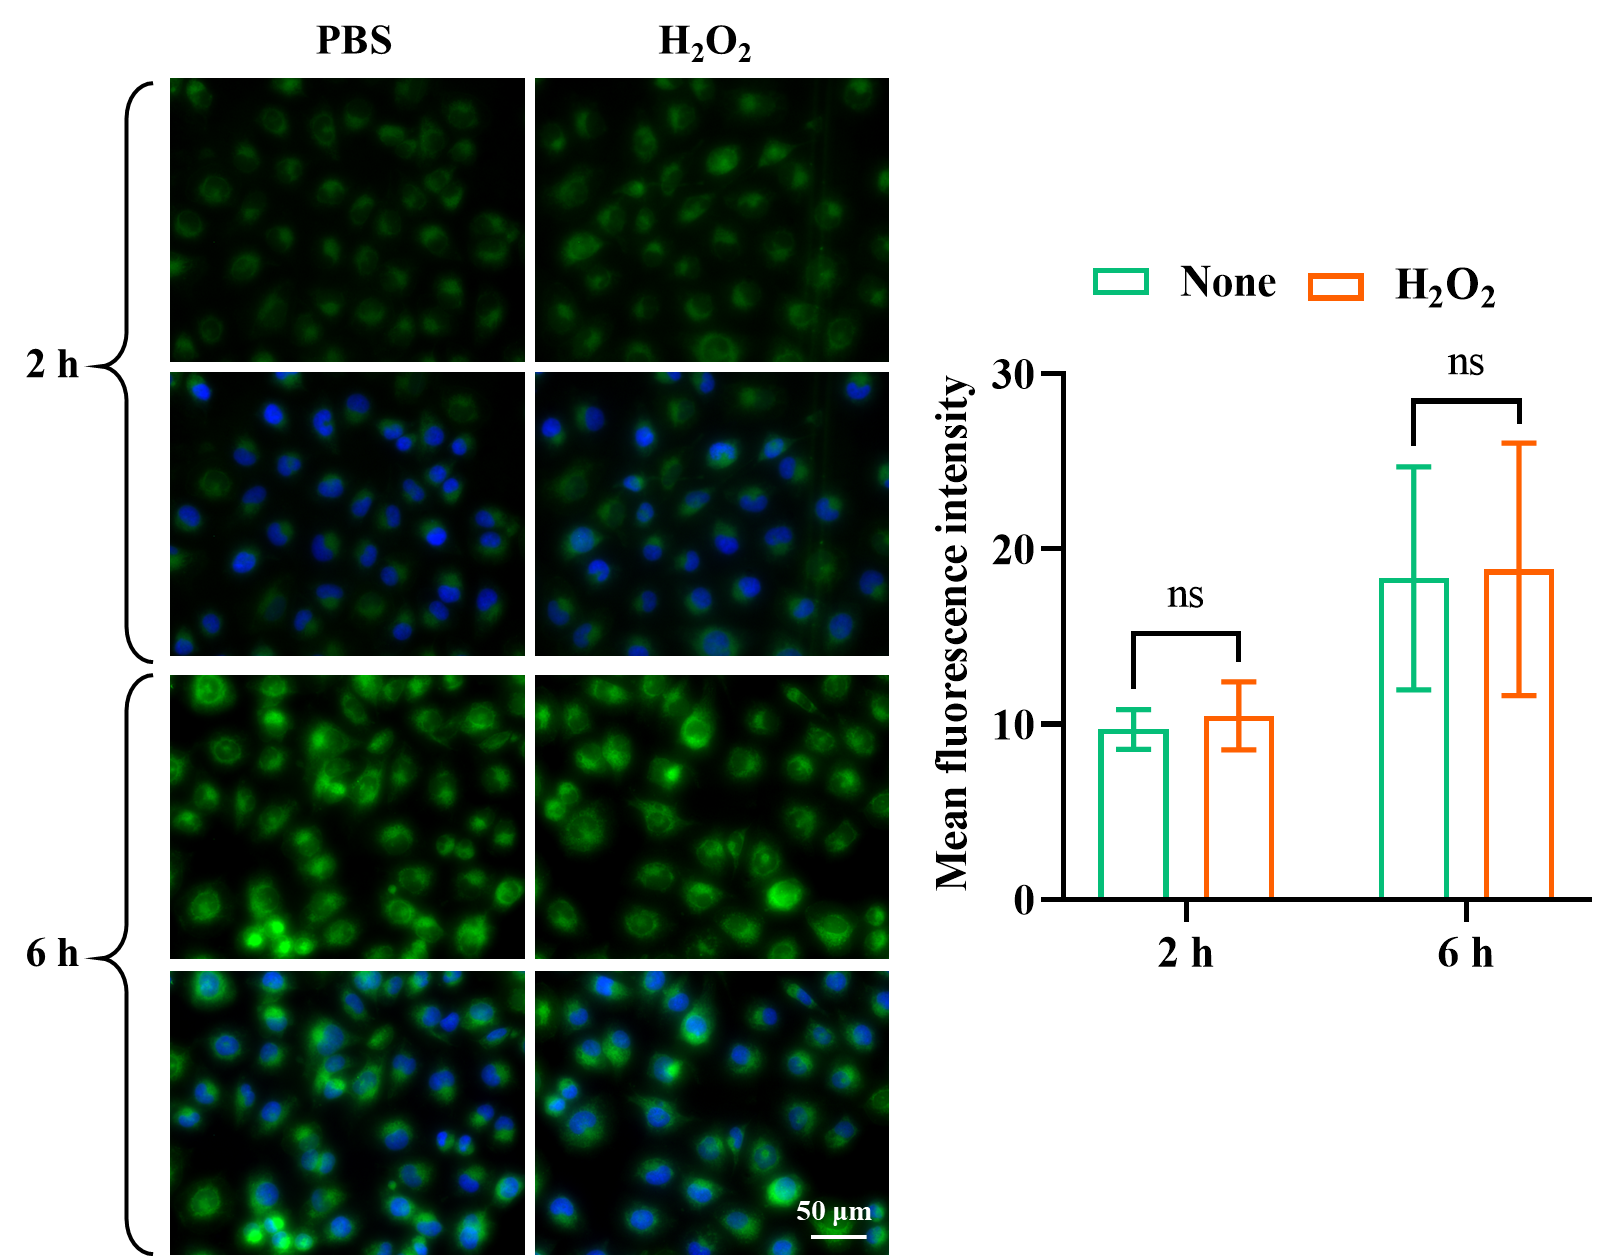


Figure S7. Fluorescence images of LMWC/Ru-Cur in PBS- or H2O2-induced HK-2 cells, and fluorescence quantitative analysis. Scale bar 50 µm. Data are presented as means ± SD with n = 6 replicates per group. ns = not significant.


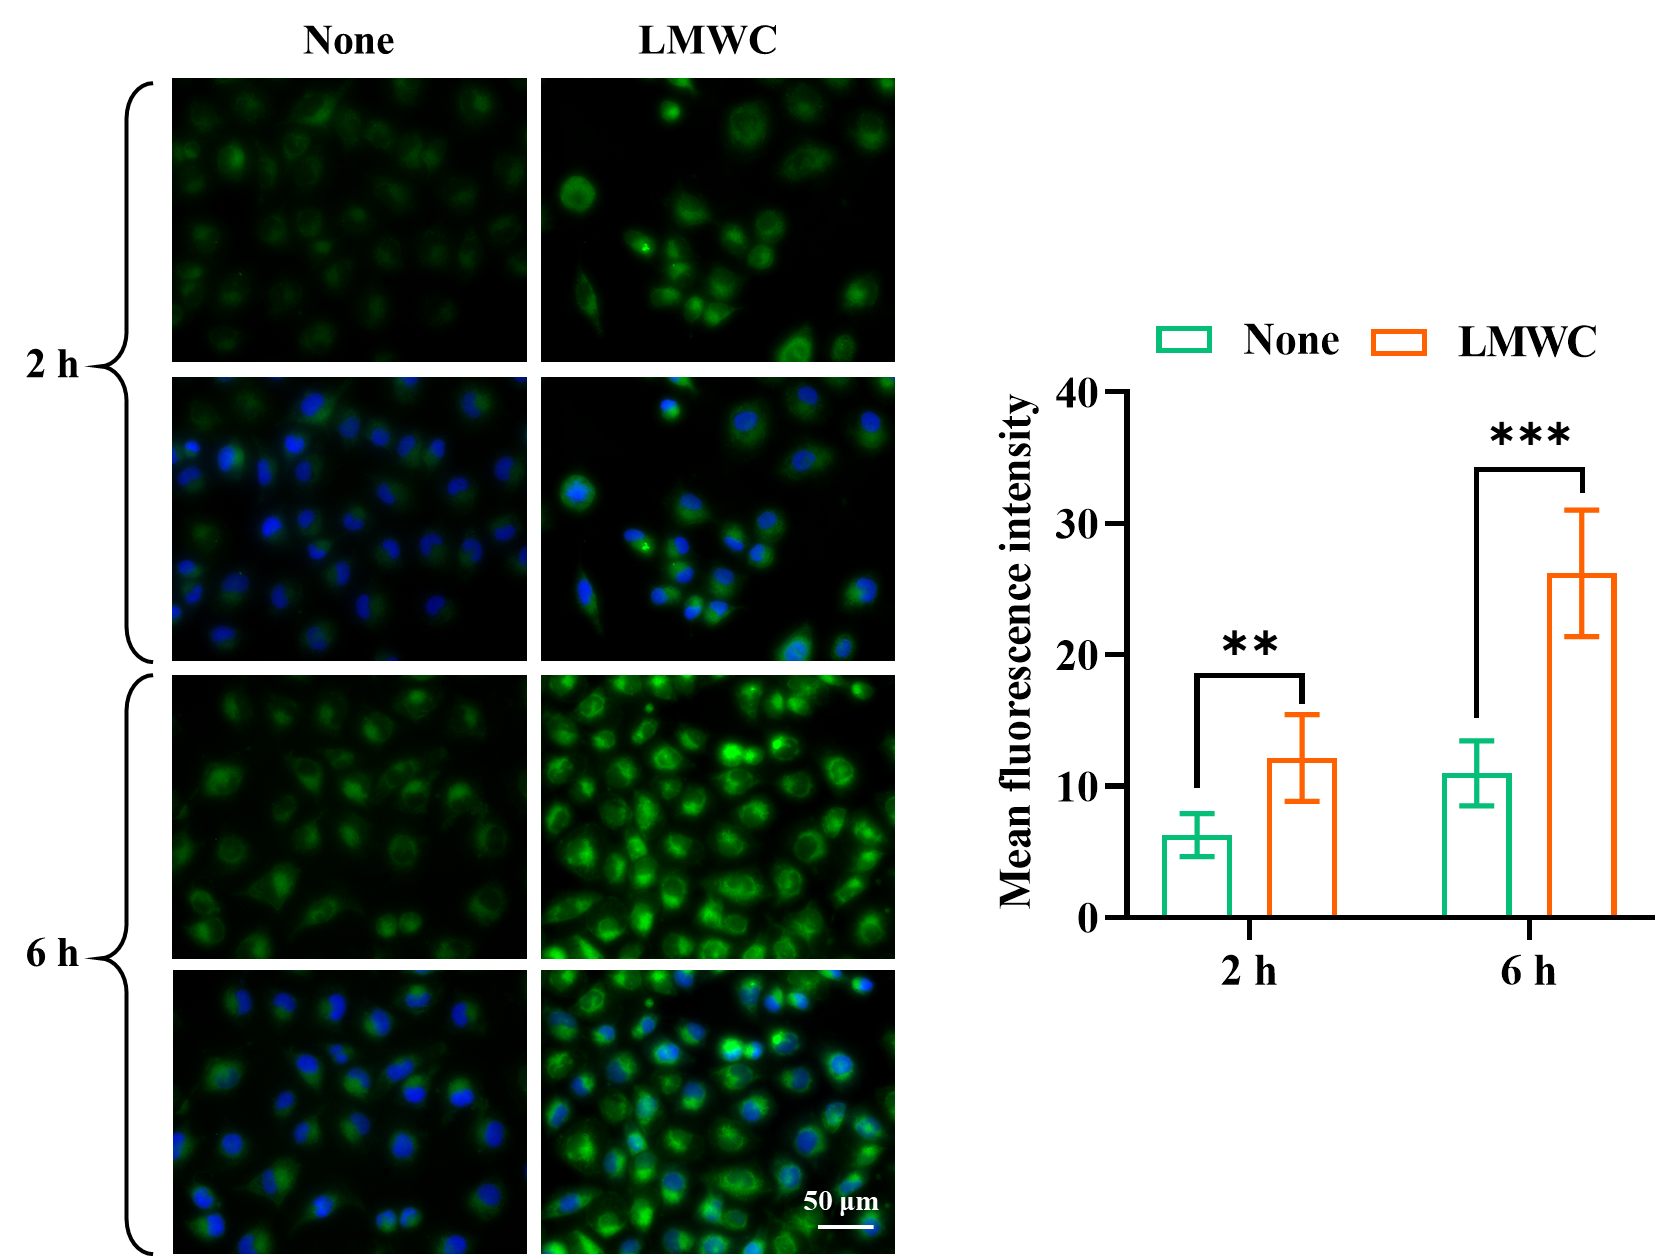


Figure S8. Fluorescence images of LMWC/Ru-Cur and LMWC+LMWC/Ru-Cur in H2O2-induced HK-2 cells, and fluorescence quantitative analysis. Scale bar 50 µm. Data are presented as means ± SD with n = 6 replicates per group. **p < 0.01, and ***p < 0.001.


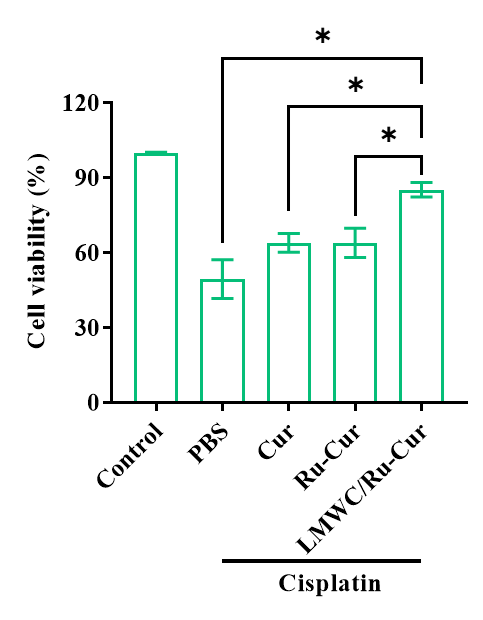


Figure S9.Cell viability of Cis-induced HK-2 cells after treated with Cur, Ru-Cur, and LMWC/Ru-Cur. Data are presented as means ± SD with n = 3 replicates per group. *p < 0.05.


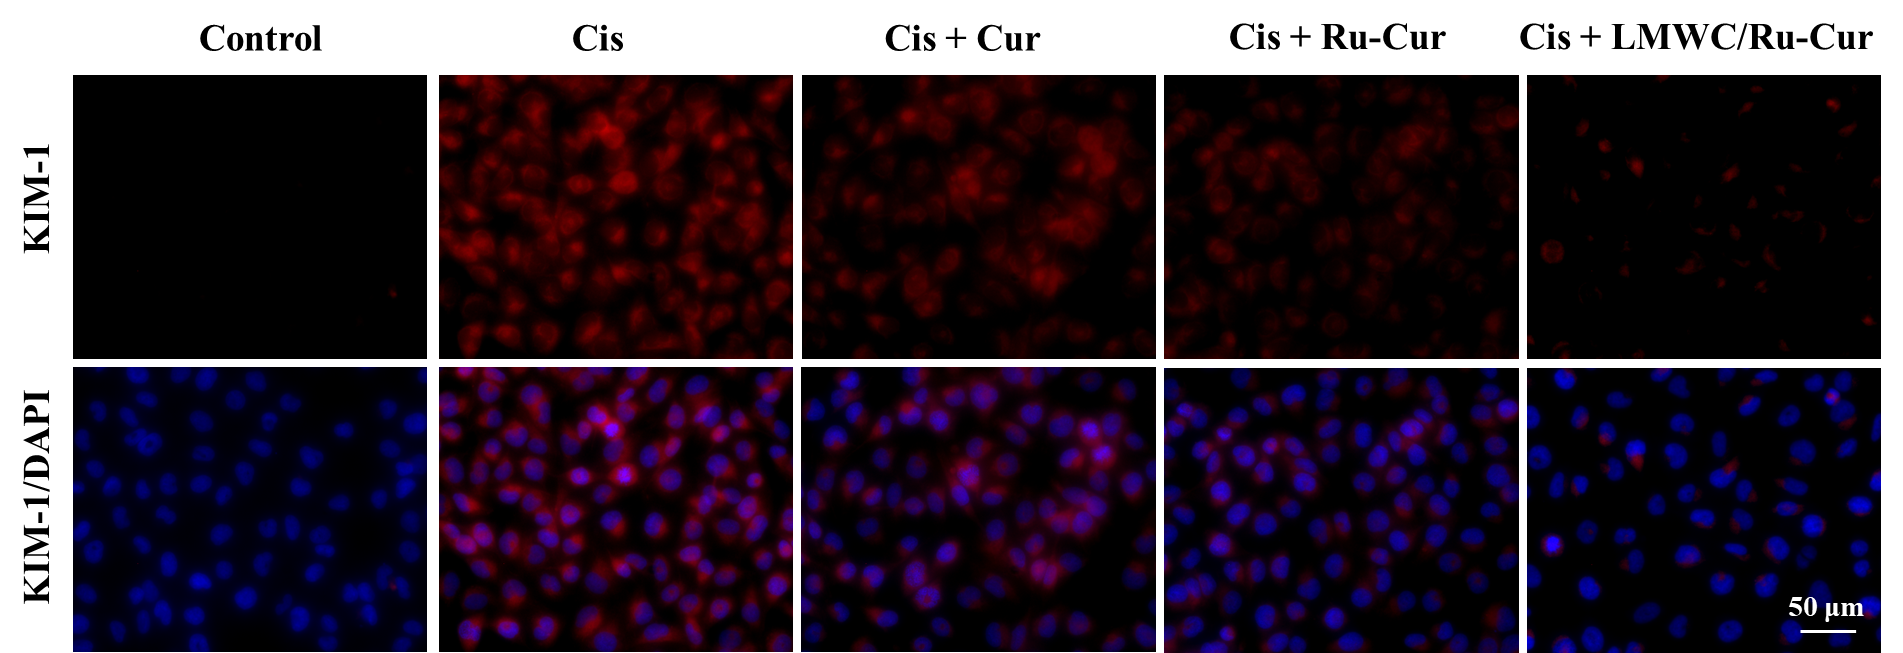


Figure S10. Immunofluorescence staining on the expression of KIM-1 in Cis-induced HK-2 cells. Scale bar 50 µm.


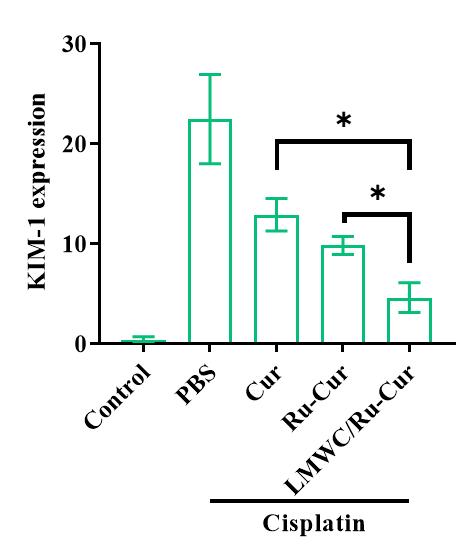


Figure S11.Fluorescence quantitative analysis on the expression of KIM-1 in Cis-induced HK-2 cells. Data are presented as means ± SD with n = 3 replicates per group. *p < 0.05.


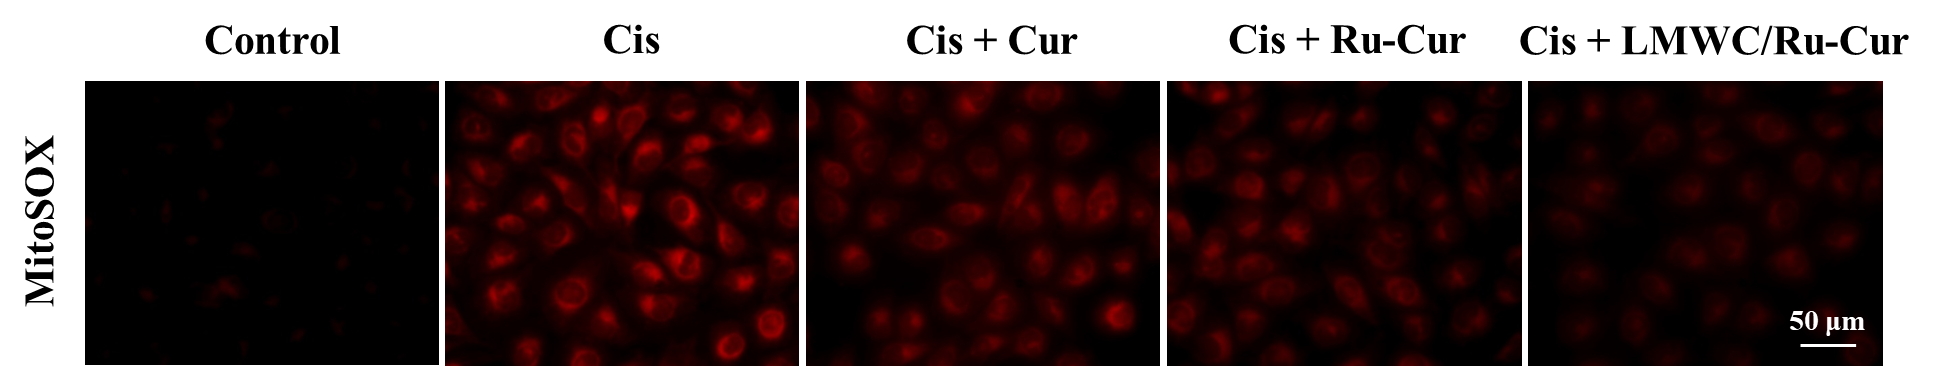


Figure S12.Fluorescence images of mitochondrial ROS levels in Cis-induced HK-2 cells detected by MitoSOX probe. Scale bar 50 µm.


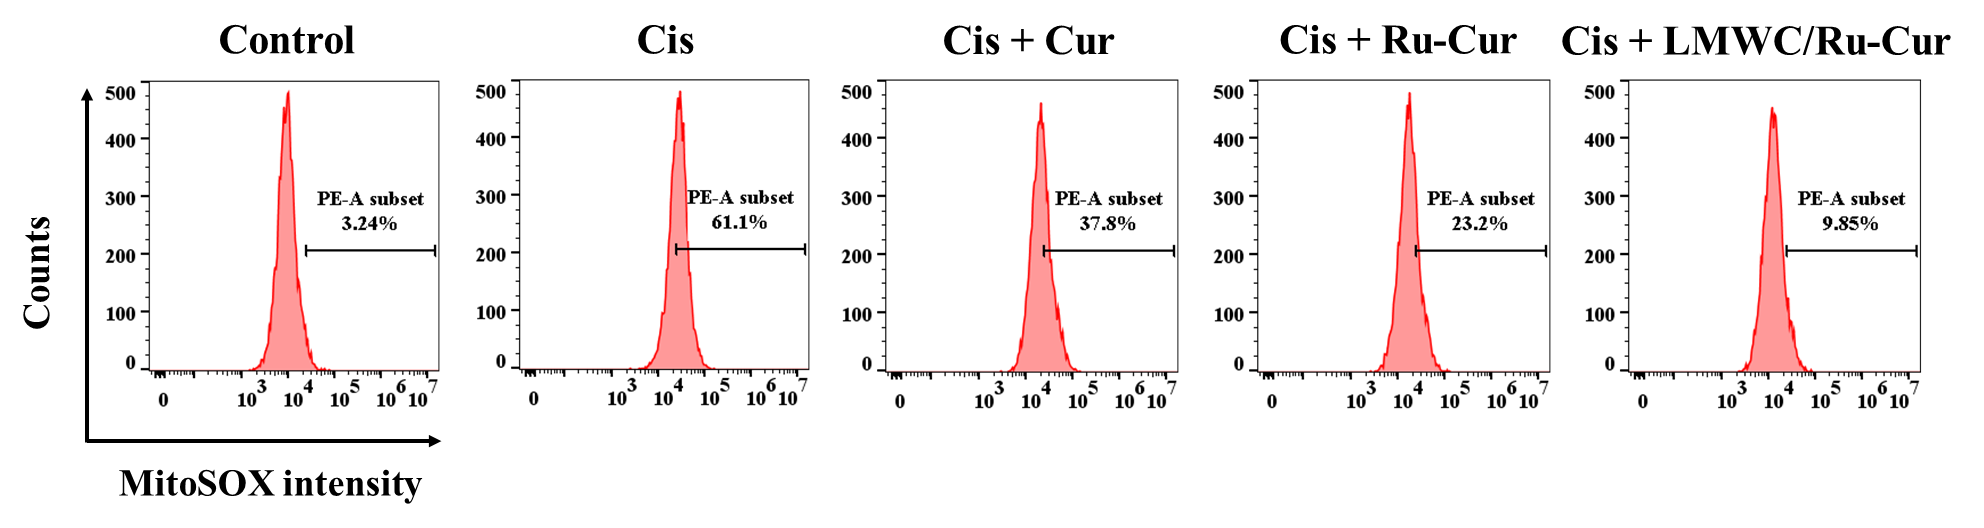


Figure S13. Flow cytometry results of mitochondrial ROS levels in Cis-induced HK-2 cells detected by MitoSOX probe.


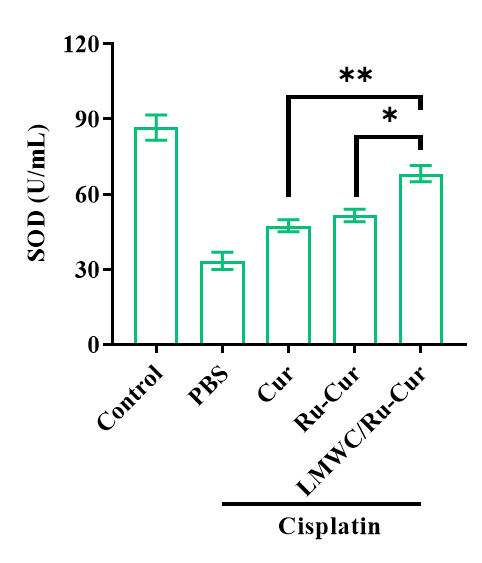


Figure S14. The changes of SOD concentrations. Data are presented as means ± SD with n = 3 replicates per group. *p < 0.05, and **p < 0.01.


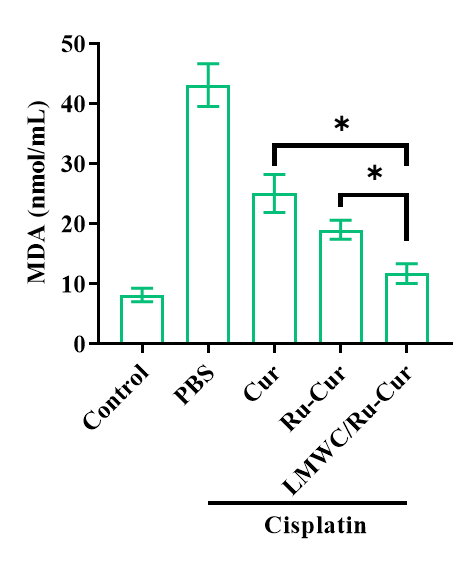


Figure S15.The changes of MDA concentrations. Data are presented as means ± SD with n = 3 replicates per group. *p < 0.05.


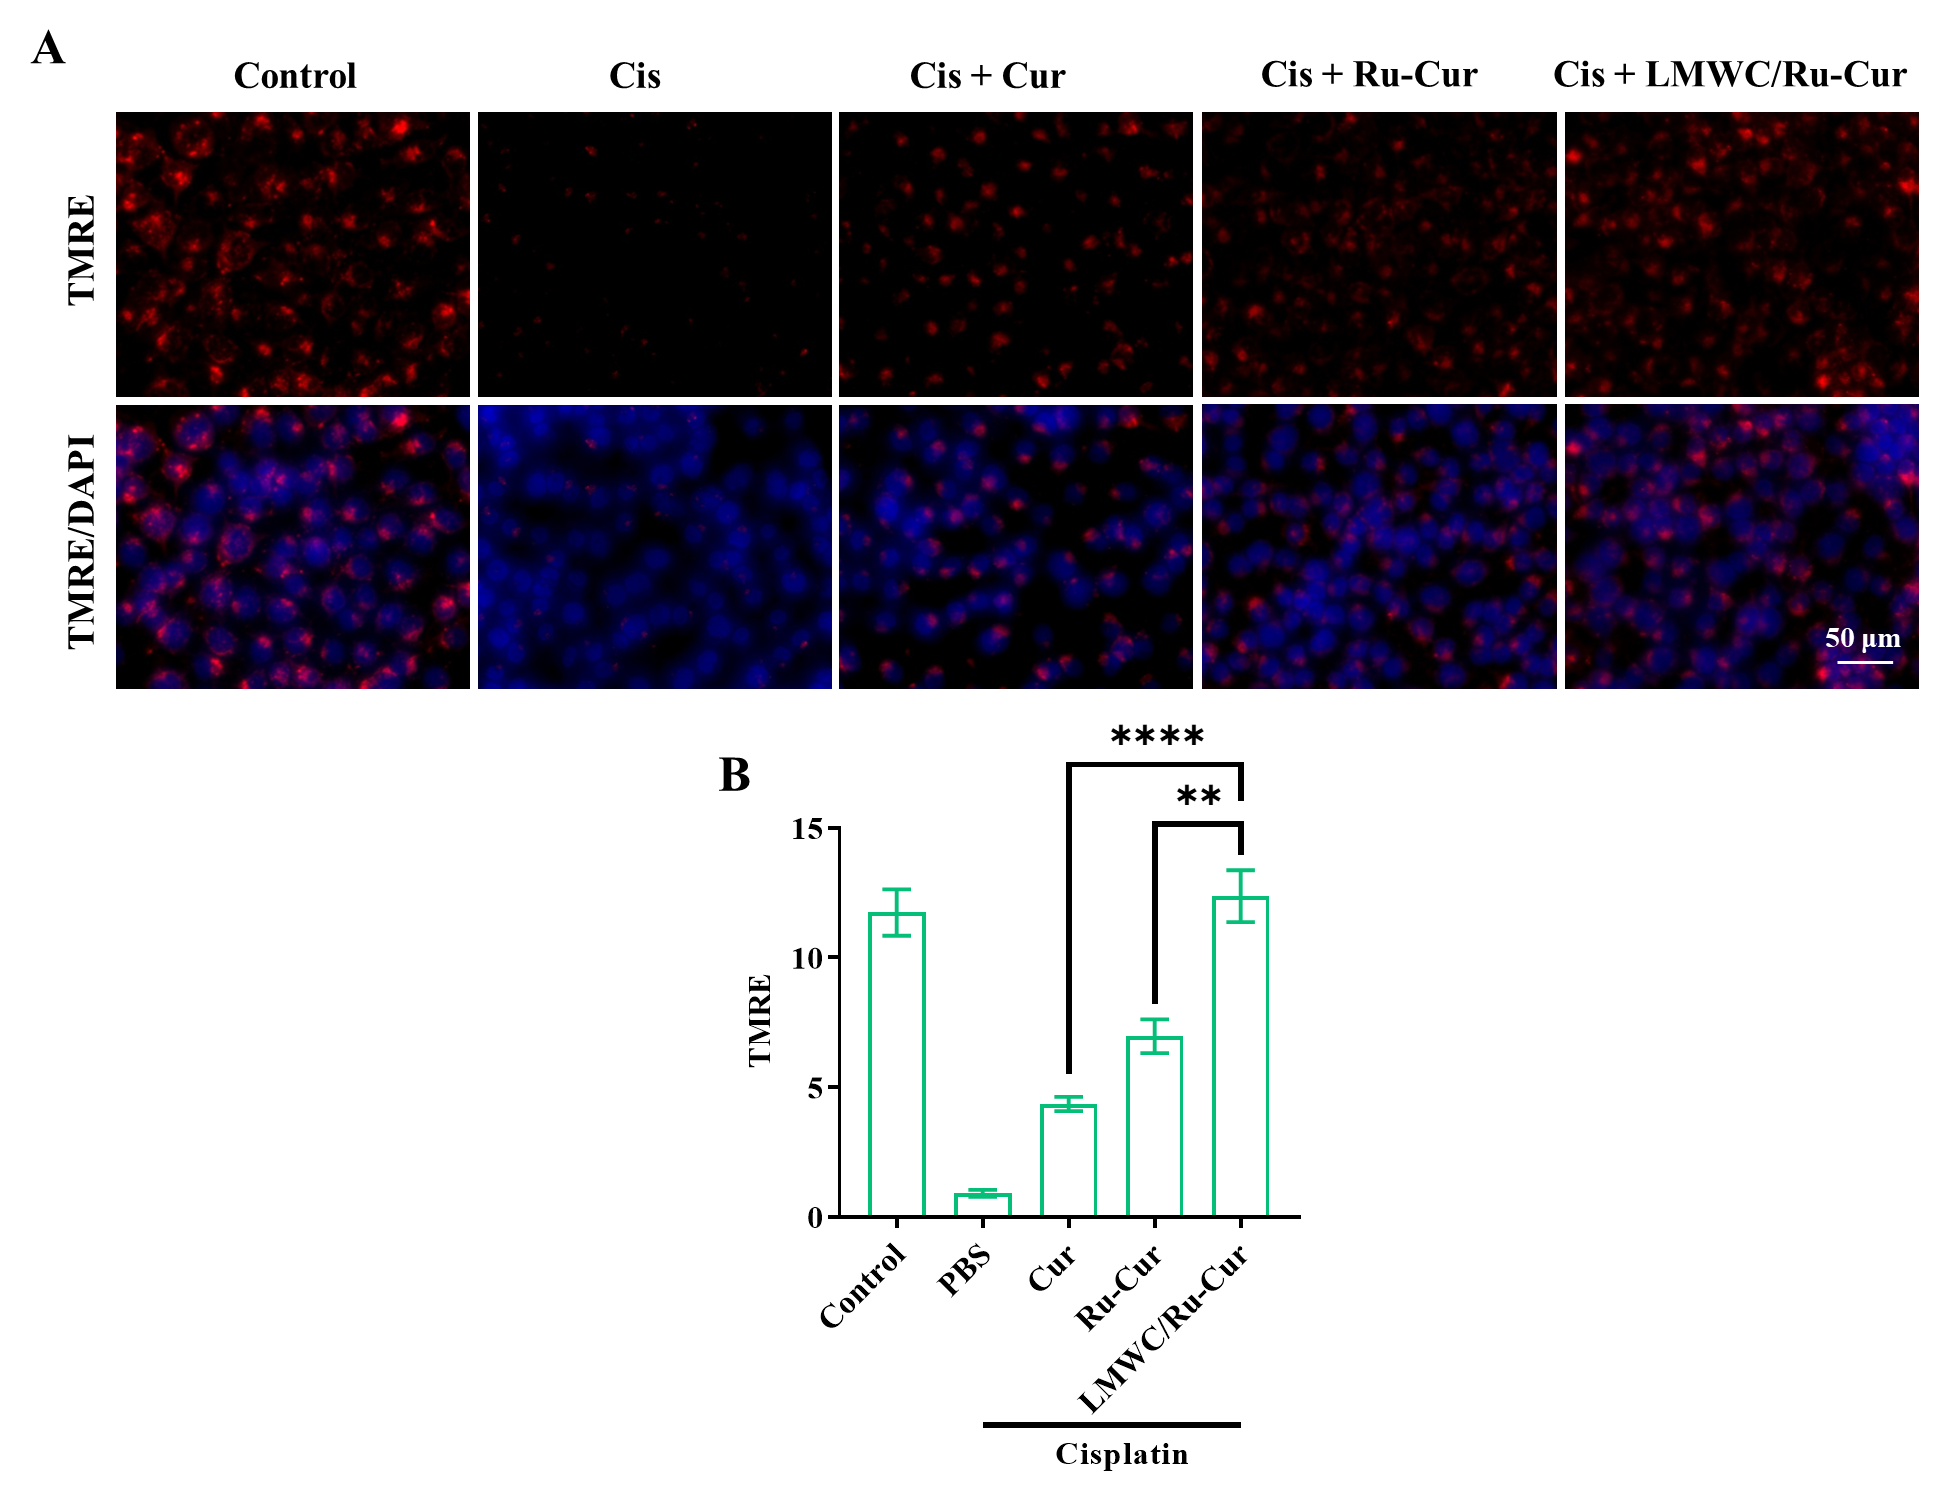


Figure S16. Fluorescence images of mitochondrial membrane potential in Cis-induced HK-2 cells detected by TMRE probe (A), and fluorescence quantitative analysis on TMRE fluorescence signals (B). Scale bar 50 µm. Data are presented as means ± SD with n = 6 replicates per group. **p < 0.01, and ****p < 0.0001.


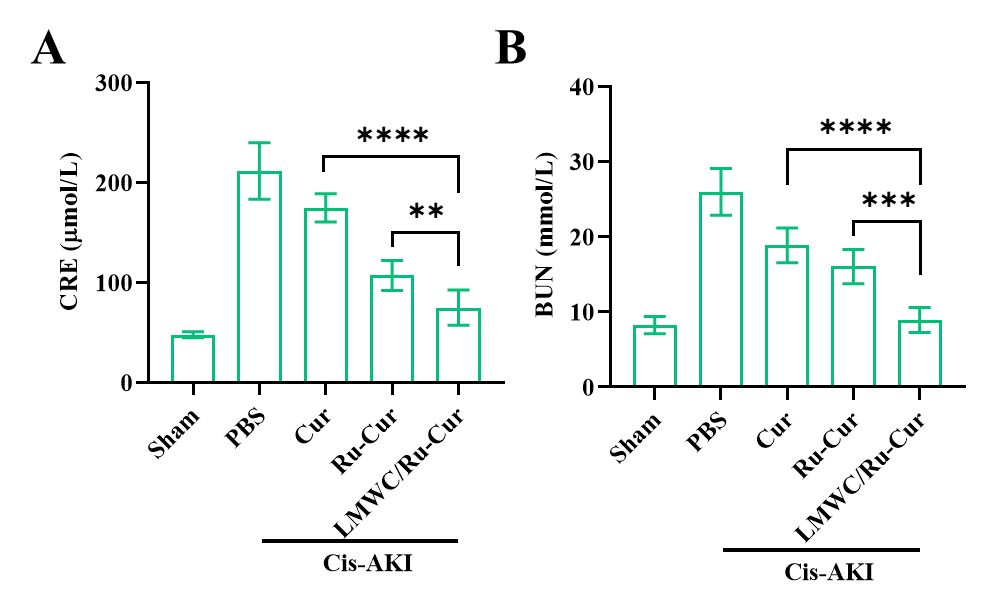


Figure S17. The changes of CRE (A) and BUN (B) in Cis-AKI mice. Data are presented as means ± SD with n = 6 replicates per group. **p < 0.01, ***p < 0.001, and ****p < 0.0001.


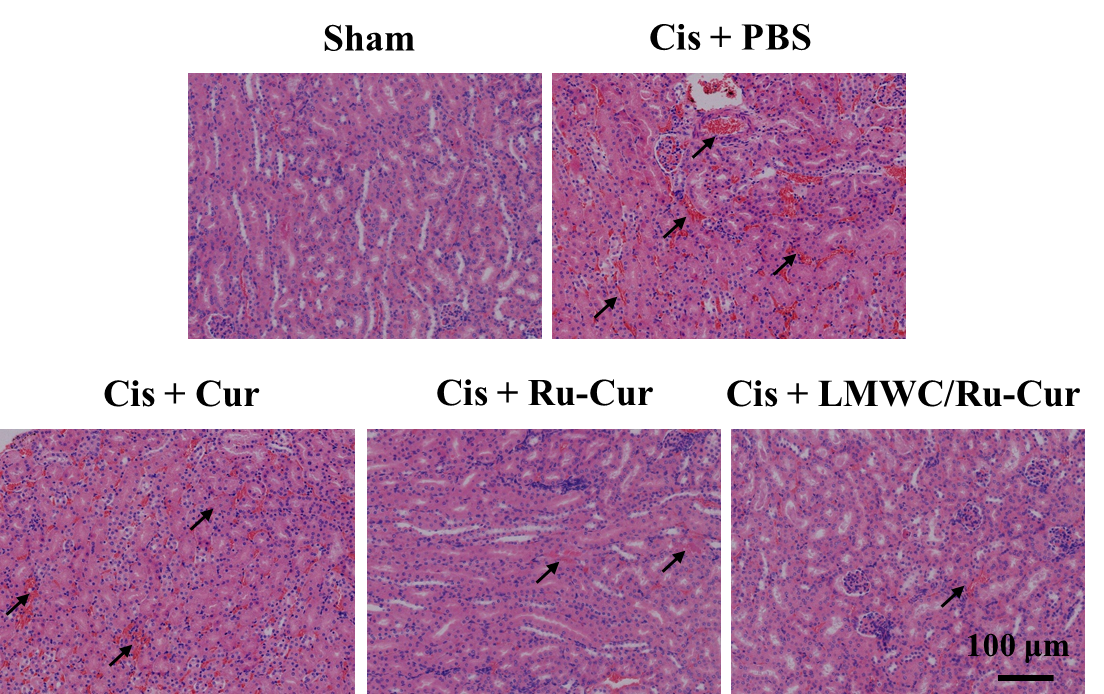


Figure S18.H&E staining sections of kidney tissues in Cis-AKI mice. Scale bar 100 µm.


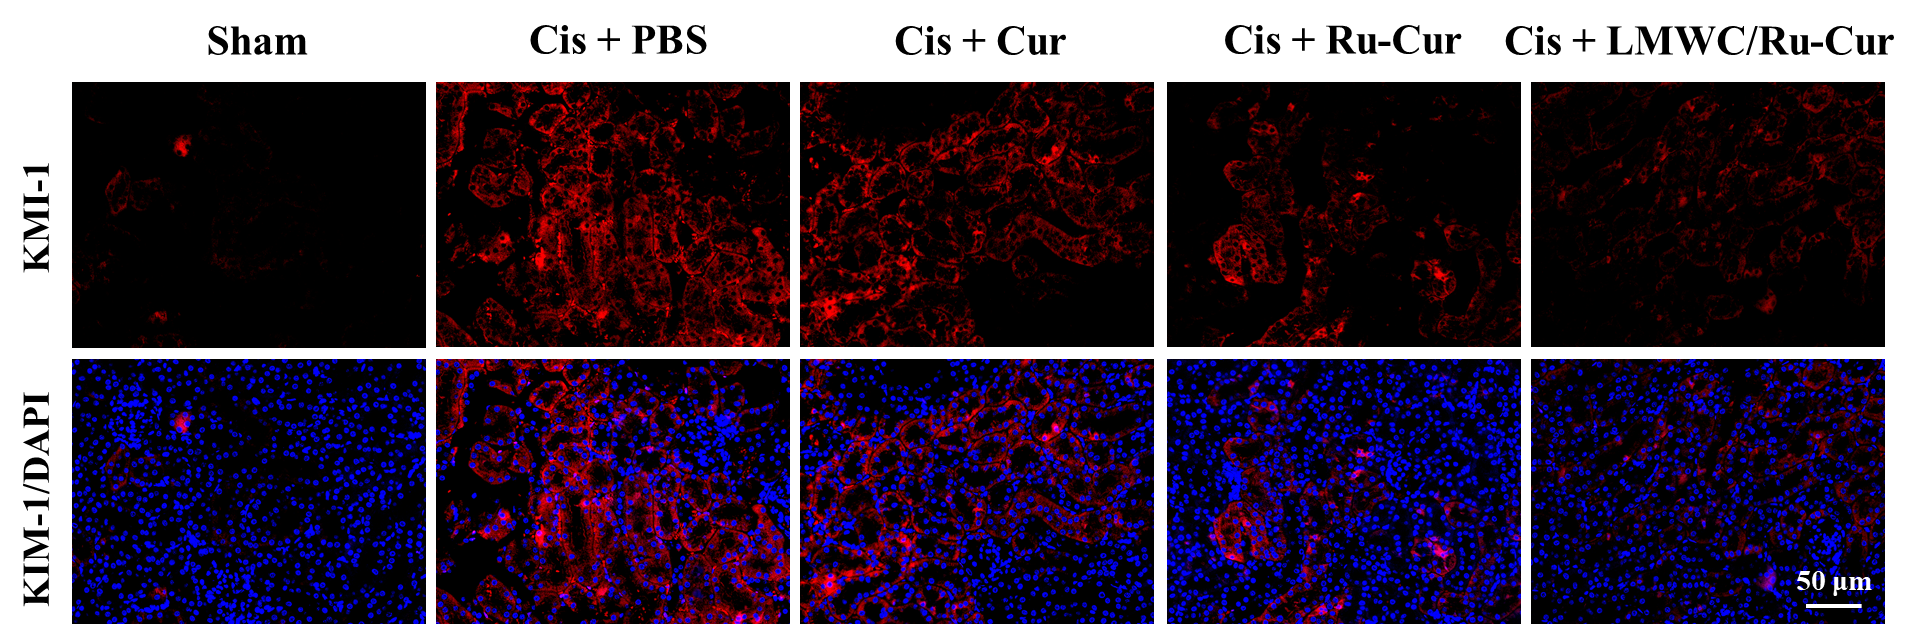


Figure S19. Fluorescence images of KIM-1 expression in kidney tissues of Cis-AKI mice. Scale bar 50 µm.


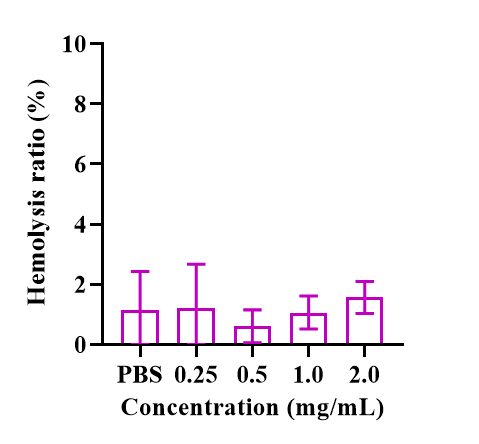


Figure S20.The hemolysis rate of LMWC/Ru-Cur nanodots. Data are presented as means ± SD with n = 3 replicates per group.


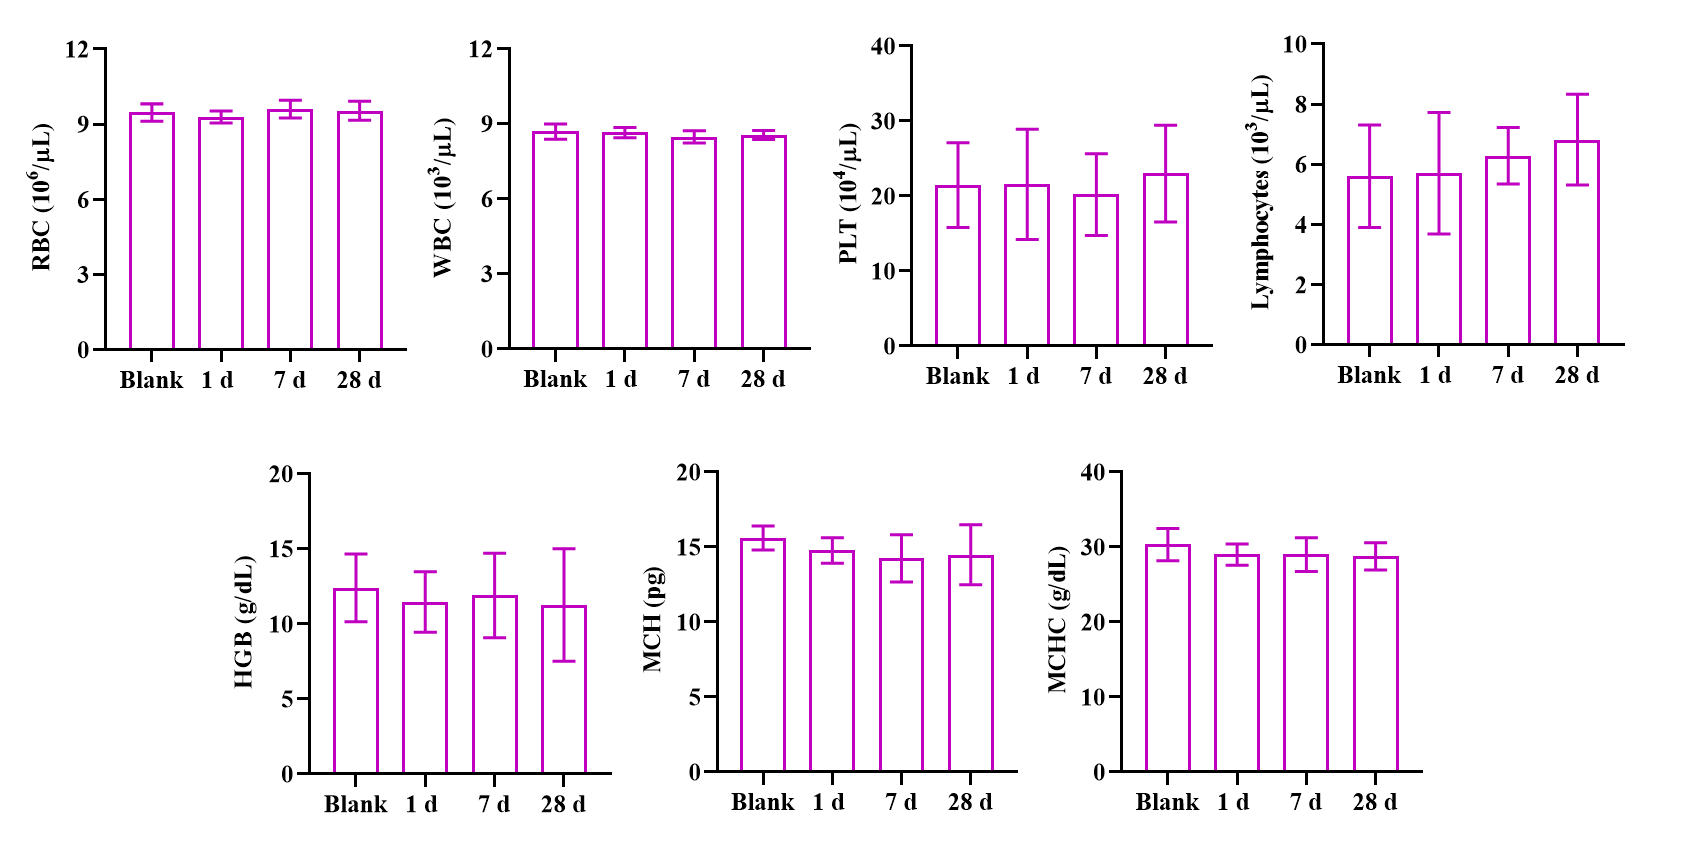


Figure S21.The changes in RBC, WBC, PLT, lymphocytes, HGB, MCH, and MCHC levels between the blank and LMWC/Ru-Cur-treated groups at all time points. Data are presented as means ± SD with n = 3 replicates per group.


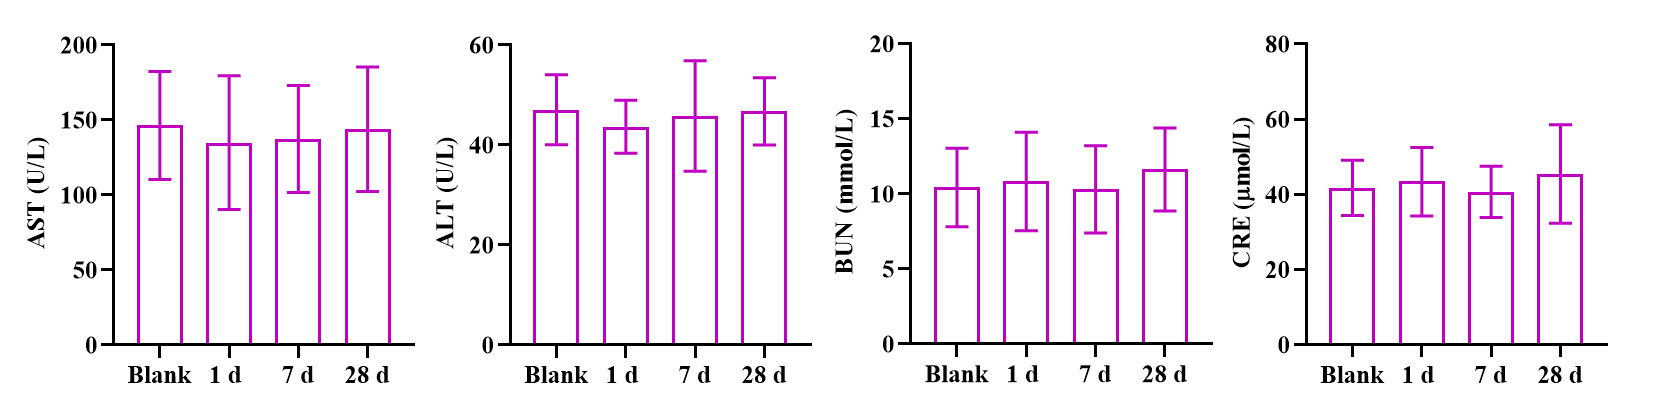


Figure S22.The changes in ALT, AST, BUN, and CRE levels between the blank and LMWC/Ru-Cur-treated groups at all time points. Data are presented as means ± SD with n = 3 replicates per group.


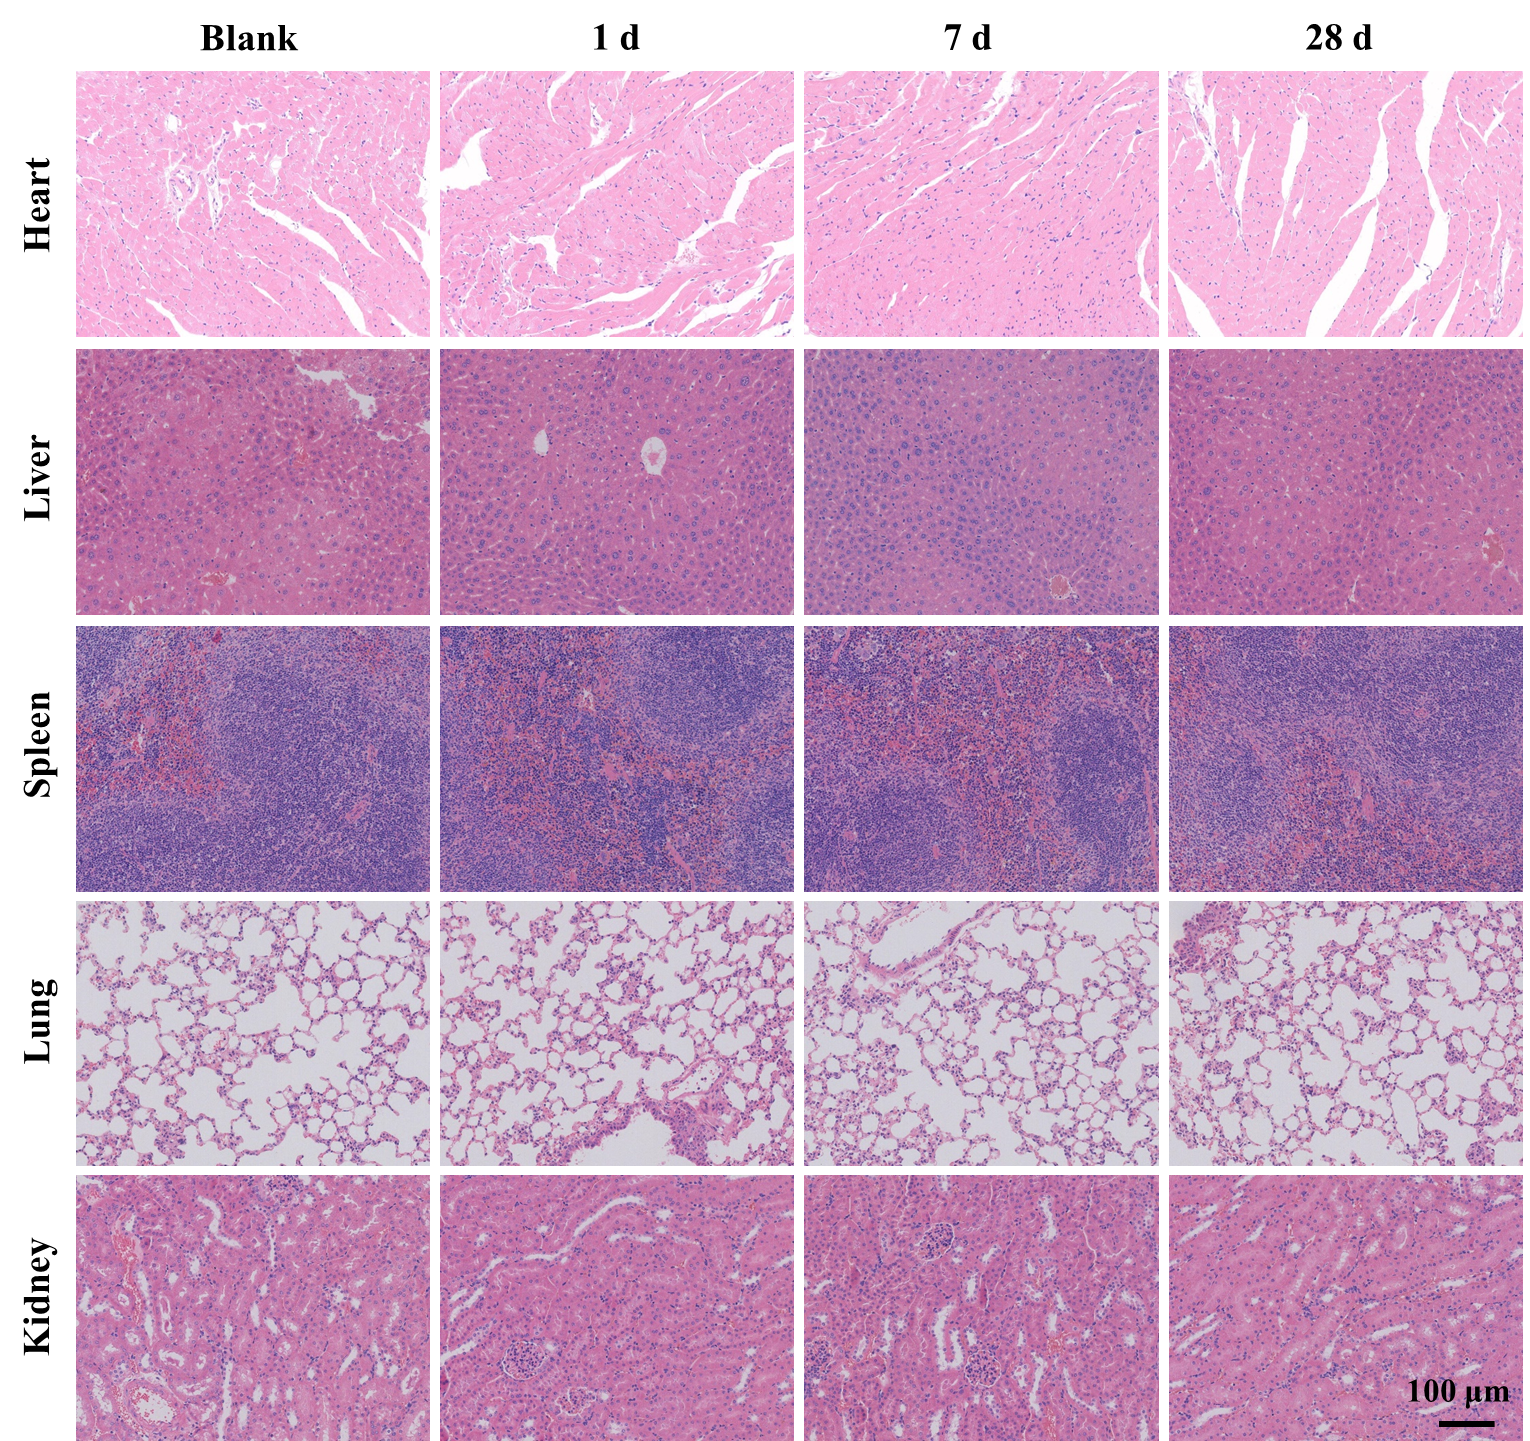


Figure S23. H&E staining sections of main tissues (heart, liver, spleen, lung, and kidney) in the blank and LMWC/Ru-Cur-treated groups at all time points. Scale bar 100 µm.
